# Supplementary material for: Cholesterol Modulation Attenuates the AD-like Phenotype Induced by Herpes Simplex Virus Type 1 Infection
Source: MDPI journal article supplement (doi:10.3390/biom14050603), 2024-05-20
Supplement: s1 [file s1]

# Original blots of Figure 3A

## Blots ICP4

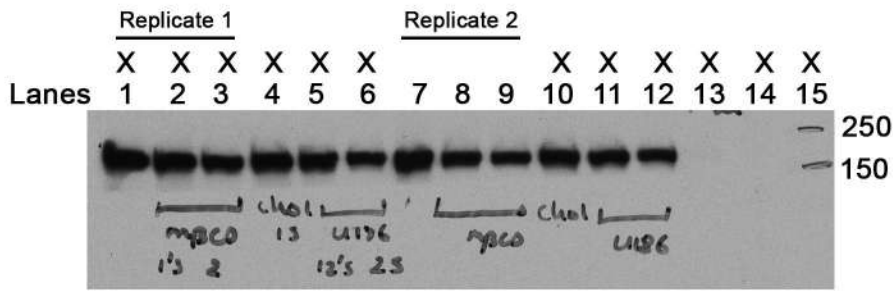

ICP4: replicates 1 and 2

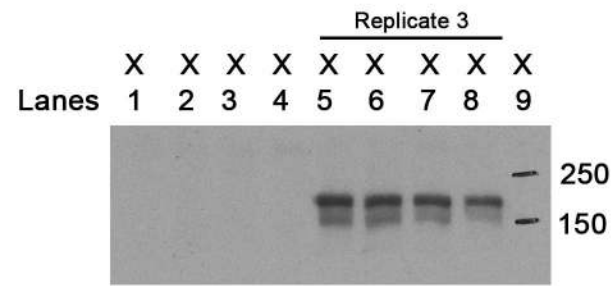

ICP4: replicate 3

## Blots gC

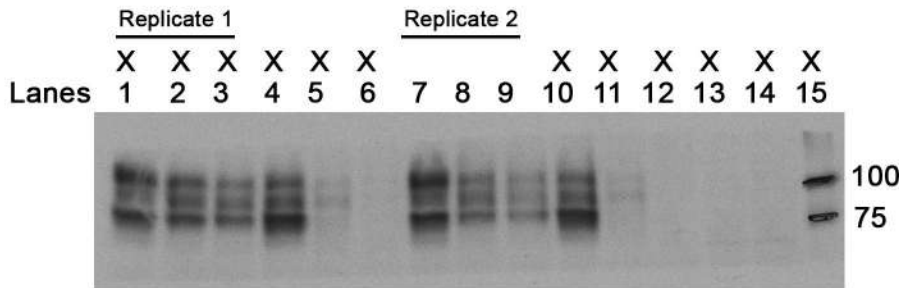

gC: replicates 1 and 2

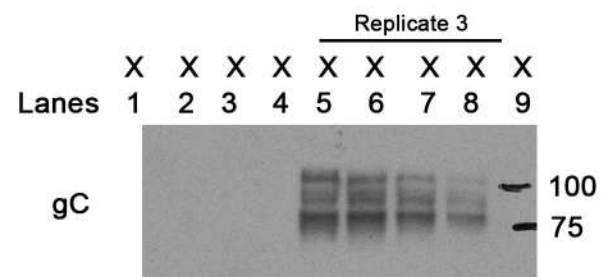

gC: replicate 3

## Blots tubulin

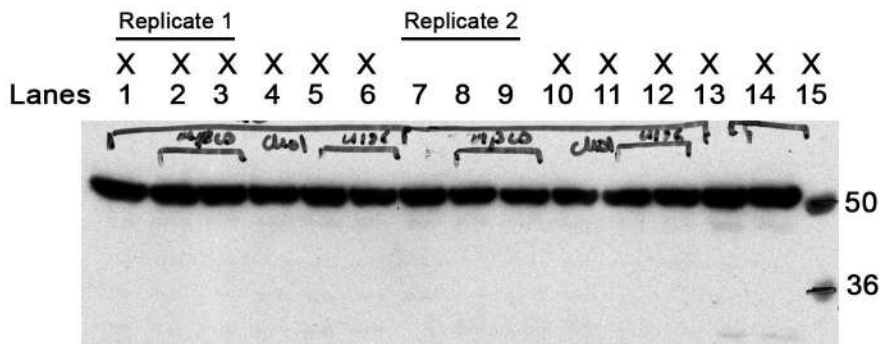

tubulin: replicates 1 and 2

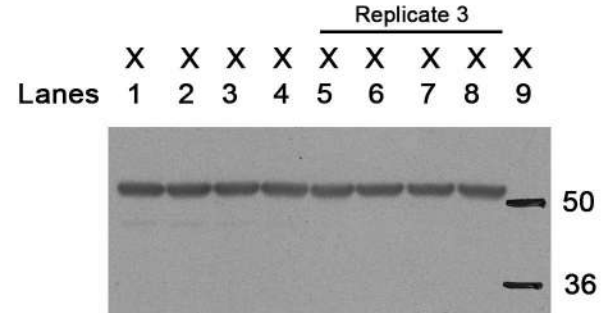

tubulin: replicate 3

| Lane | Sample                                                                             |
|------|------------------------------------------------------------------------------------|
| 1    | SK-N-MC infected cells moi 10 18 hpi. Exp 1                                        |
| 2    | SK-N-MC infected cells moi 10 18 hpi + MBCD 1.5 mM. Exp 1                          |
| 3    | SK-N-MC infected cells moi 10 18 hpi + MBCD 2 mM. Exp 1                            |
| 4    | SK-N-MC infected cells moi 10 18 hpi + Cholesterol 15 µg/ml. Exp 1                 |
| 5    | SK-N-MC infected cells moi 10 18 hpi + U18666A 12.5 µg/ml. Exp 1                   |
| 6    | SK-N-MC infected cells moi 10 18 hpi + U18666A 25 µg/ml. Exp 1                     |
| 7    | SK-N-MC infected cells moi 10 18 hpi. Exp 2                                        |
| 8    | SK-N-MC infected cells moi 10 18 hpi + MBCD 1.5 mM. Exp 2                          |
| 9    | SK-N-MC infected cells moi 10 18 hpi + MBCD 2 mM. Exp 2                            |
| 10   | SK-N-MC infected cells moi 10 18 hpi + Cholesterol 15 µg/ml. Exp 2                 |
| 11   | SK-N-MC infected cells moi 10 18 hpi + U18666A 12.5 µg/ml. Exp 2                   |
| 12   | SK-N-MC infected cells moi 10 18 hpi + U18666A 25 µg/ml. Exp 2                     |
| 13   | SK-N-MC mock cells Exp 1                                                           |
| 14   | SK-N-MC mock cells Exp 2                                                           |
| 15   | Molecular weight markers<br>(Precision Plus Protein Standards Dual Color (BioRad)) |

| Lane | Sample                                                                             |
|------|------------------------------------------------------------------------------------|
| 1    | SK-N-MC mock cells. Exp 3                                                          |
| 2    | SK-N-MC mock cells + MBCD 1 mM. Exp 3                                              |
| 3    | SK-N-MC mock cells + MBCD 1.5 mM. Exp 3                                            |
| 4    | SK-N-MC mock cells + MBCD 2 mM. Exp 3                                              |
| 5    | SK-N-MC infected cells moi 10 18 hpi. Exp 3                                        |
| 6    | SK-N-MC infected cells moi 10 18 hpi + MBCD 1 mM. Exp 3                            |
| 7    | SK-N-MC infected cells moi 10 18 hpi + MBCD 1.5 mM. Exp 3                          |
| 8    | SK-N-MC infected cells moi 10 18 hpi + MBCD 2 mM. Exp 3                            |
| 9    | Molecular weight markers<br>(Precision Plus Protein Standards Dual Color (BioRad)) |

# Original blots of Figure 3B

## Blots ICP4

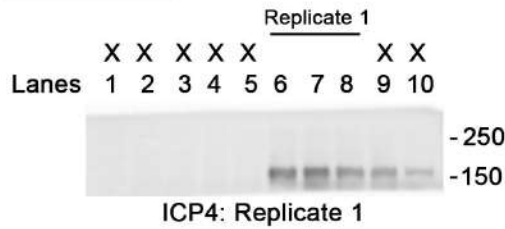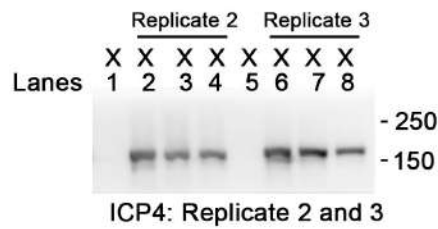

## Blots tubulin of ICP4

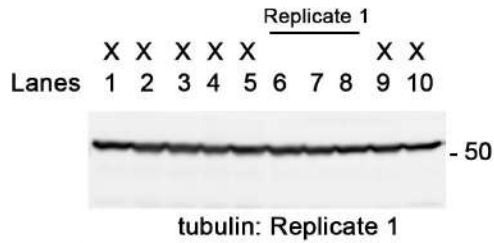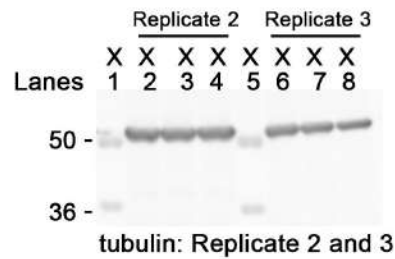

| Lane | Sample                                               |
|------|------------------------------------------------------|
| 1    | N2a mock cells Exp 1                                 |
| 2    | N2a mock cells +MBCD 2.5 mM Exp 1                    |
| 3    | N2a mock cells +MBCD 3 mM Exp 1                      |
| 4    | N2a mock cells +MBCD 3.5 mM Exp 1                    |
| 5    | N2a mock cells +MBCD 4 mM Exp 1                      |
| 6    | N2a infected cells moi 10 18 hpi Exp 1               |
| 7    | N2a infected cells moi 10 18 hpi + MBCD 2.5 mM Exp 1 |
| 8    | N2a infected cells moi 10 18 hpi + MBCD 3 mM Exp 1   |
| 9    | N2a infected cells moi 10 18 hpi + MBCD 3.5 mM Exp 1 |
| 10   | N2a infected cells moi 10 18 hpi + MBCD 4 mM Exp 1   |

| Lane | Sample                                                                                   |
|------|------------------------------------------------------------------------------------------|
| 1    | Molecular weight markers (kDa)<br>(Precision Plus Protein Standards Dual Color (BioRad)) |
| 2    | N2a infected cells moi 10 18 hpi Exp 2                                                   |
| 3    | N2a infected cells moi 10 18 hpi + MBCD 2.5 mM Exp 2                                     |
| 4    | N2a infected cells moi 10 18 hpi + MBCD 3 mM Exp 2                                       |
| 5    | Molecular weight markers (kDa)<br>(Precision Plus Protein Standards Dual Color (BioRad)) |
| 6    | N2a infected cells moi 10 18 hpi Exp 3                                                   |
| 7    | N2a infected cells moi 10 18 hpi + MBCD 2.5 mM Exp 3                                     |
| 8    | N2a infected cells moi 10 18 hpi + MBCD 3 mM Exp 3                                       |

## Blots gC

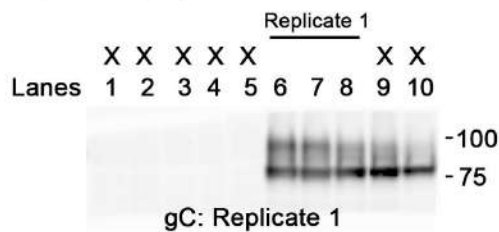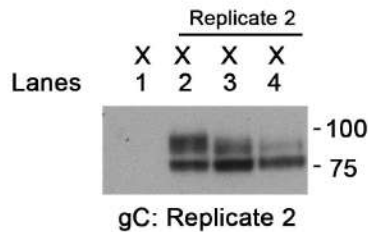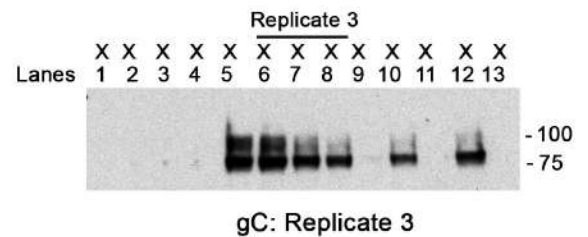

## Blots tubulin of gC

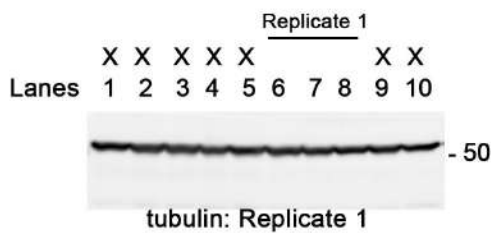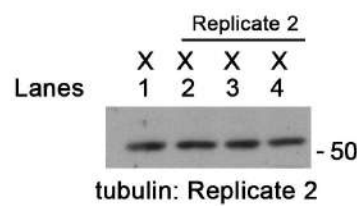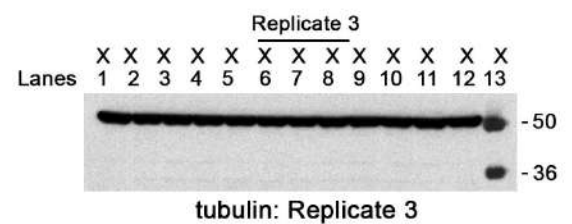

| Lane | Sample                                               |
|------|------------------------------------------------------|
| 1    | N2a mock cells Exp 1                                 |
| 2    | N2a mock cells +MBCD 2.5 mM Exp 1                    |
| 3    | N2a mock cells +MBCD 3 mM Exp 1                      |
| 4    | N2a mock cells +MBCD 3.5 mM Exp 1                    |
| 5    | N2a mock cells +MBCD 4 mM Exp 1                      |
| 6    | N2a infected cells moi 10 18 hpi Exp 1               |
| 7    | N2a infected cells moi 10 18 hpi + MBCD 2.5 mM Exp 1 |
| 8    | N2a infected cells moi 10 18 hpi + MBCD 3 mM Exp 1   |
| 9    | N2a infected cells moi 10 18 hpi + MBCD 3.5 mM Exp 1 |
| 10   | N2a infected cells moi 10 18 hpi + MBCD 4 mM Exp 1   |

| Lane | Sample                                               |
|------|------------------------------------------------------|
| 1    | N2a mock cells Exp 2                                 |
| 2    | N2a infected cells moi 10 18 hpi Exp 2               |
| 3    | N2a infected cells moi 10 18 hpi + MBCD 2.5 mM Exp 2 |
| 4    | N2a infected cells moi 10 18 hpi + MBCD 3 mM Exp 2   |

| Lane | Sample                                                                             |
|------|------------------------------------------------------------------------------------|
| 1    | N2a mock cells, control infection                                                  |
| 2    | N2a mock cells Exp 3                                                               |
| 3    | N2a mock cells +MBCD 2.5 mM Exp 3                                                  |
| 4    | N2a mock cells +MBCD 3 mM Exp 3                                                    |
| 5    | N2a moi 10 cells 18 hpi, control infection                                         |
| 6    | N2a infected cells moi 10 18 hpi Exp 3                                             |
| 7    | N2a infected cells moi 10 18 hpi + MBCD 2.5 mM Exp 3                               |
| 8    | N2a infected cells moi 10 18 hpi + MBCD 3 mM Exp 3                                 |
| 9    | N2a infected cells mock + U18666A 25 µg/ml. Exp 3                                  |
| 10   | N2a infected cells moi 10 18 hpi + U18666A 25 µg/ml Exp 3                          |
| 11   | N2a infected cells mock + Cholesterol 15 µg/ml. Exp 3                              |
| 12   | N2a infected cells moi 10 18 hpi + Cholesterol 15 µg/ml Exp 3                      |
| 13   | Molecular weight markers<br>(Precision Plus Protein Standards Dual Color (BioRad)) |

## Original blots of Figure 4A

### Blots ICP4

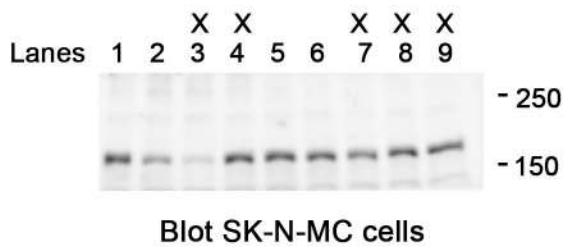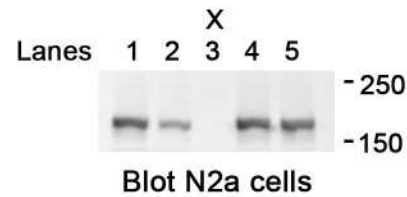

### Blots tubulin

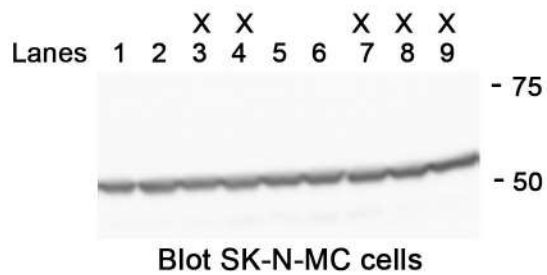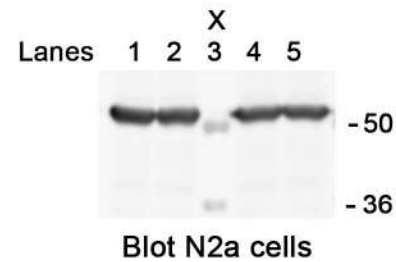

| Lane | Sample                                                                                               |
|------|------------------------------------------------------------------------------------------------------|
| 1    | SK-N-MC infected cells moi 10 <sup>5</sup> hpi (-1 hpi)                                              |
| 2    | SK-N-MC infected cells moi 10 <sup>5</sup> hpi + MBCD 2 mM (-1 hpi)                                  |
| 3    | SK-N-MC infected cells moi 10 <sup>5</sup> hpi (-1 hpi) + U18666A 12.5 µg/ml                         |
| 4    | SK-N-MC infected cells moi 10 <sup>5</sup> hpi (-1 hpi) + Cholesterol 15 µg/ml                       |
| 5    | SK-N-MC infected cells moi 10 <sup>5</sup> hpi (0 hpi)                                               |
| 6    | SK-N-MC infected cells moi 10 <sup>5</sup> hpi + MBCD 2 mM (0 hpi)                                   |
| 7    | SK-N-MC infected cells moi 10 <sup>5</sup> hpi (0 hpi) + U18666A 12.5 µg/ml                          |
| 8    | SK-N-MC infected cells moi 10 <sup>5</sup> hpi (0 hpi) + Cholesterol 15 µg/ml                        |
| 9    | SK-N-MC infected cells moi 10 <sup>5</sup> hpi (0 hpi) + PAA 100 µg/ml (viral replication inhibitor) |

| Lane | Sample                                                                                   |
|------|------------------------------------------------------------------------------------------|
| 1    | N2a infected cells moi 10 <sup>5</sup> hpi (-1 hpi)                                      |
| 2    | N2a infected cells moi 10 <sup>5</sup> hpi + MBCD 3 mM (-1 hpi)                          |
| 3    | Molecular weight markers (kDa)<br>(Precision Plus Protein Standards Dual Color (BioRad)) |
| 4    | N2a infected cells moi 10 <sup>5</sup> hpi (0 hpi)                                       |
| 5    | N2a infected cells moi 10 <sup>5</sup> hpi + MBCD 3 mM (0 hpi)                           |



## Original blots of Figure 4C

### Blots ICP4

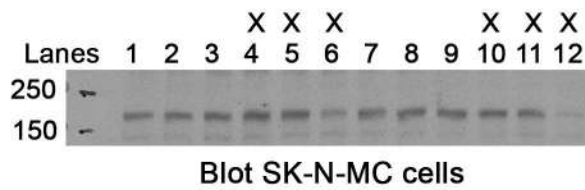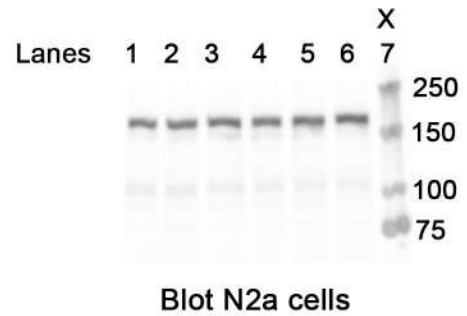

### Blots tubulin

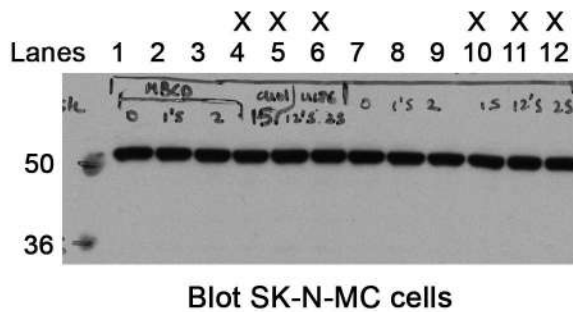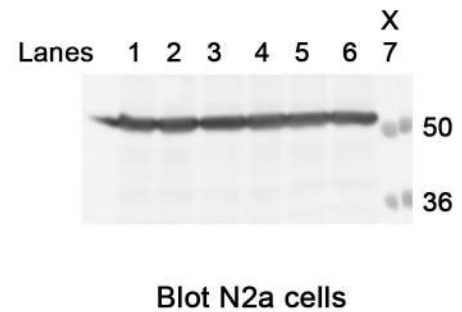

| Lane | Sample                                                                   |
|------|--------------------------------------------------------------------------|
| 1    | SK-N-MC infected cells moi 10 5 hpi                                      |
| 2    | SK-N-MC infected cells moi 10 5 hpi + MBCD 1.5 mM                        |
| 3    | SK-N-MC infected cells moi 10 5 hpi + MBCD 2 mM                          |
| 4    | SK-N-MC infected cells moi 10 5 hpi + Cholesterol 15 µg/ml               |
| 5    | SK-N-MC infected cells cells moi 5 18 hpi + U18666A 12.5 µg/ml           |
| 6    | SK-N-MC infected cells cells moi 5 18 hpi + U18666A 25 µg/ml             |
| 7    | SK-N-MC infected cells moi 10 5 hpi + citrate                            |
| 8    | SK-N-MC infected cells moi 10 5 hpi + citrate + MBCD 1.5 mM              |
| 9    | SK-N-MC infected cells moi 10 5 hpi + citrate + MBCD 2 mM                |
| 10   | SK-N-MC infected cells moi 10 5 hpi + citrate + Cholesterol 15 µg/ml     |
| 11   | SK-N-MC infected cells cells moi 10 5 hpi + citrate + U18666A 12.5 µg/ml |
| 12   | SK-N-MC infected cells cells moi 10 5 hpi + citrate + U18666A 25 µg/ml   |

| Lane | Sample                                                                                   |
|------|------------------------------------------------------------------------------------------|
| 1    | N2a infected cells moi 10 5 hpi                                                          |
| 2    | N2a infected cells moi 10 5 hpi + MBCD 2.5 mM                                            |
| 3    | N2a infected cells moi 10 5 hpi + MBCD 3 mM                                              |
| 4    | N2a infected cells moi 10 5 hpi + citrate                                                |
| 5    | N2a infected cells moi 10 5 hpi + citrate + MBCD 2.5 mM                                  |
| 6    | N2a infected cells moi 10 5 hpi + citrate + MBCD 3 mM                                    |
| 7    | Molecular weight markers (kDa)<br>(Precision Plus Protein Standards Dual Color (BioRad)) |

# Original blots of Figure 4D

## Blots gC

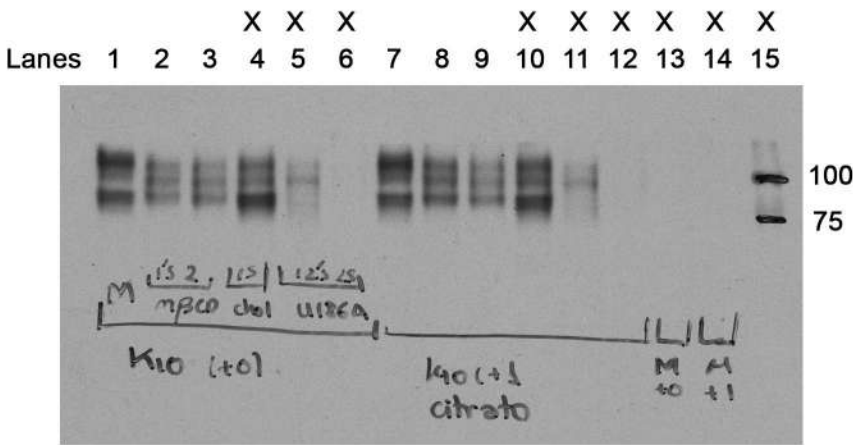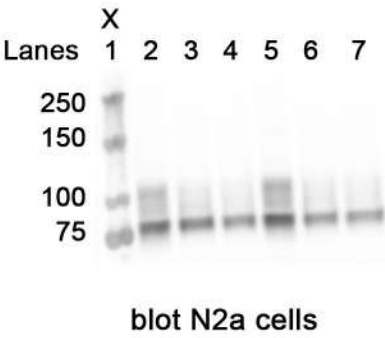

## Blots tubulin

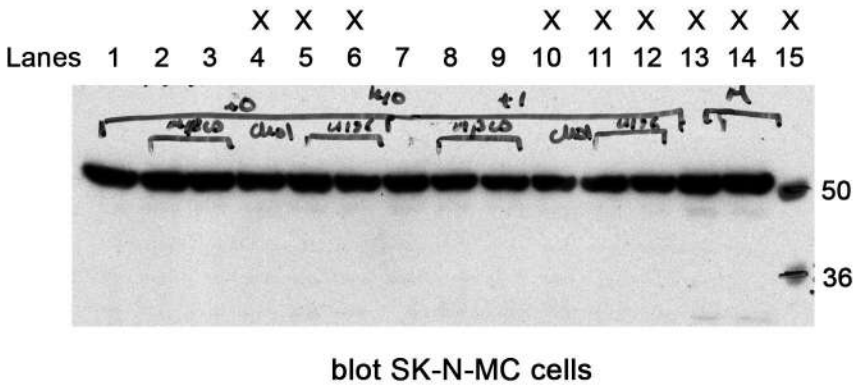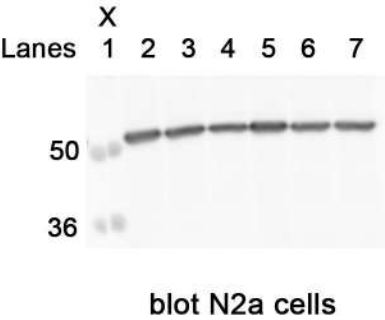

| Lane | Sample                                                                                   |
|------|------------------------------------------------------------------------------------------|
| 1    | SK-N-MC infected cells moi 10 18 hpi                                                     |
| 2    | SK-N-MC infected cells moi 10 18 hpi + MBCD 1.5 mM                                       |
| 3    | SK-N-MC infected cells moi 10 18 hpi + MBCD 2 mM                                         |
| 4    | SK-N-MC infected cells moi 10 18 hpi + Cholesterol 15 µg/ml                              |
| 5    | SK-N-MC infected cells cells moi 10 18 hpi + U18666A 12.5 µg/ml                          |
| 6    | SK-N-MC infected cells cells moi 10 18 hpi + U18666A 25 µg/ml                            |
| 7    | SK-N-MC infected cells moi 10 18 hpi + citrate                                           |
| 8    | SK-N-MC infected cells moi 10 18 hpi + citrate + MBCD 1.5 mM                             |
| 9    | SK-N-MC infected cells moi 10 18 hpi + citrate + MBCD 2 mM                               |
| 10   | SK-N-MC infected cells moi 10 18 hpi + citrate + Cholesterol 15 µg/ml                    |
| 11   | SK-N-MC infected cells cells moi 10 18 hpi + citrate + U18666A 12.5 µg/ml                |
| 12   | SK-N-MC infected cells cells moi 10 18 hpi + citrate + U18666A 25 µg/ml                  |
| 13   | SK-N-MC mock cells                                                                       |
| 14   | SK-N-MC mock cells + citrate                                                             |
| 15   | Molecular weight markers (kDa)<br>(Precision Plus Protein Standards Dual Color (BioRad)) |

| Lane | Sample                                                                                   |
|------|------------------------------------------------------------------------------------------|
| 1    | Molecular weight markers (kDa)<br>(Precision Plus Protein Standards Dual Color (BioRad)) |
| 2    | N2a infected cells moi 10 18 hpi                                                         |
| 3    | N2a infected cells moi 10 18 hpi + MBCD 2.5 mM                                           |
| 4    | N2a infected cells moi 10 18 hpi + MBCD 3 mM                                             |
| 5    | N2a infected cells moi 10 18 hpi + citrate                                               |
| 6    | N2a infected cells moi 10 18 hpi + citrate + MBCD 2.5 mM                                 |
| 7    | N2a infected cells moi 10 18 hpi + citrate + MBCD 3 mM                                   |

## Original blots of Figure 6F

### Blot Ser422

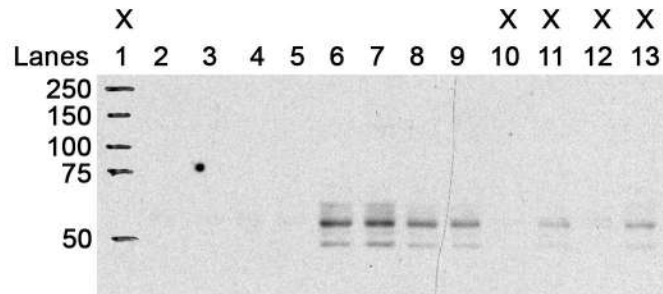

### Blot tubulin

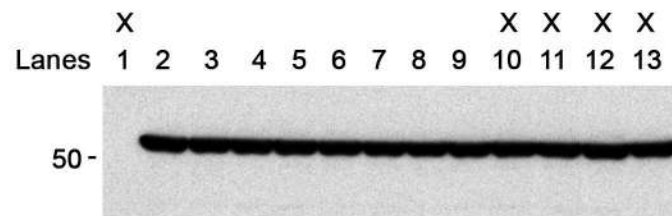

| Lane | Sample                                                                                   |
|------|------------------------------------------------------------------------------------------|
| 1    | Molecular weight markers (kDa)<br>(Precision Plus Protein Standards Dual Color (BioRad)) |
| 2    | SK-N-MC mock cells 18 hpi                                                                |
| 3    | SK-N-MC mock cells 18 hpi + MBCD 1 mM                                                    |
| 4    | SK-N-MC mock cells 18 hpi + MBCD 1.5 mM                                                  |
| 5    | SK-N-MC mock cells 18 hpi + MBCD 2 mM                                                    |
| 6    | SK-N-MC infected cells moi 10 18 hpi                                                     |
| 7    | SK-N-MC infected cells moi 10 18 hpi + MBCD 1 mM                                         |
| 8    | SK-N-MC infected cells moi 10 18 hpi + MBCD 1.5 mM                                       |
| 9    | SK-N-MC infected cells moi 10 18 hpi + MBCD 2 mM                                         |
| 10   | SK-N-MC mock cells + U18666A 25 µg/ml                                                    |
| 11   | SK-N-MC infected cells moi 10 18 hpi + U18666A 25 µg/ml                                  |
| 12   | SK-N-MC mock cells + Cholesterol 15 µg/ml                                                |
| 13   | SK-N-MC infected cells moi 10 18 hpi + Cholesterol 15 µg/ml                              |
